# Supplementary material for: The impact of increases in South Asian anthropogenic emissions of SO 2 on sulfate loading in the upper troposphere and lower stratosphere during the monsoon season and the associated radiative impact
Source: Copernicus journal article supplement (doi:10.5194/acp-2019-81), 2019-03-01
Supplement: Supplementary file 1 [file acp-2019-81-supplement.pdf]

Supplementary figures

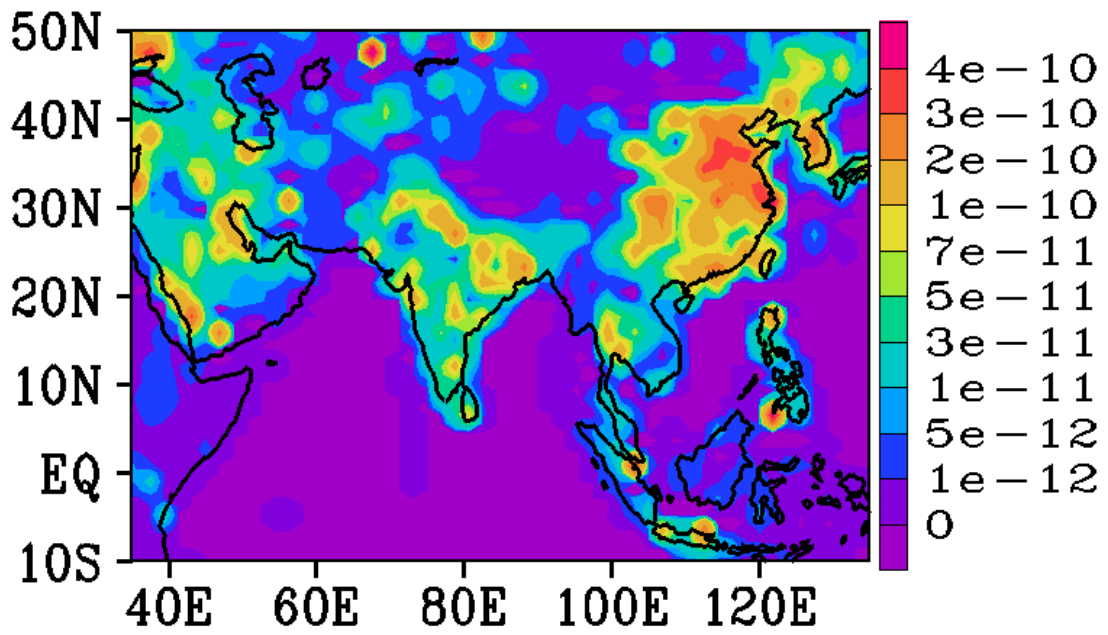

Figure S1. Distribution of SO<sub>2</sub> emission mass flux (kg·m<sup>-2</sup>·s<sup>-1</sup>) averaged for June–September from AEROCOMM-ACCIM II.

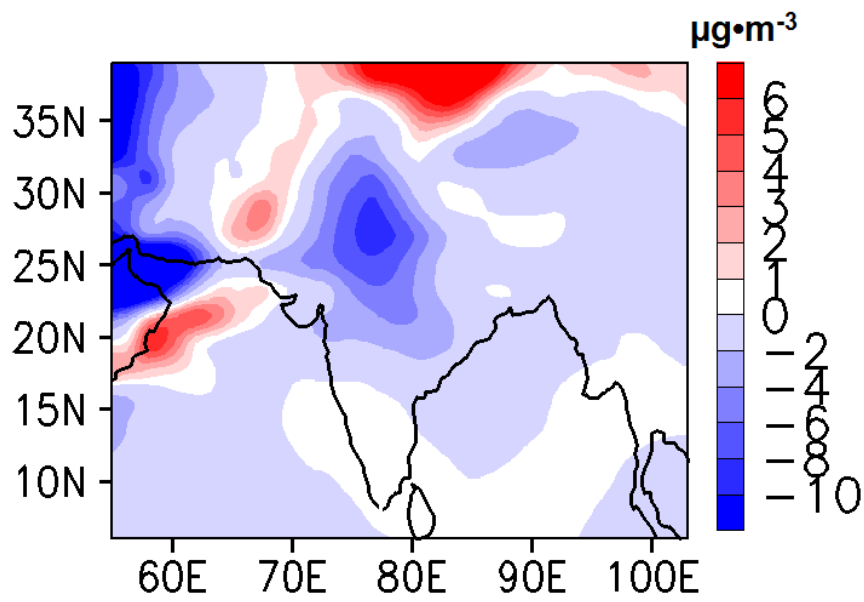

Figure S2: Distribution of anomalies (CTRL-Ind48) averaged for June-September for dust aerosols ( $\mu\text{g}\cdot\text{m}^{-3}$ ) averaged over 1000 - 850 hPa pressure levels.
